# Supplementary material for: Changes in the Estimated Glucose Disposal Rate and Incident Cardiovascular Disease in Patients with Cardiovascular–Kidney–Metabolic Syndrome Stages 0–3: A Prospective Cohort Study in China
Source: Research Square preprint supplement (doi:10.21203/rs.3.rs-7331938/v1), 2025-09-11
Supplement: Supplementary file 1 [file 145ce5f0791e11f381f026d7.docx]

**Table S4. Association between different eGDR change and CVD after excluding individuals with missing value**

|  | **Crude model** |  | **Model1** |  | **Model2** |  |
| --- | --- | --- | --- | --- | --- | --- |
| eGDR | OR（95%CI） | P value | OR（95%CI） | P value | OR（95%CI） | P value |
| Change in the eGDR | | | | | | |
| 1 | Ref |  | Ref |  | Ref |  |
| 2 | 2.02 (1.51-2.69) | <0.001 | 1.93 (1.44-2.59) | <0.001 | 1.86 (1.38-2.49) | <0.001 |
| 3 | 2.64 (2.07-3.39) | <0.001 | 2.42 (1.89-3.12) | <0.001 | 1.95 (1.44-2.62) | <0.001 |
| Cumulative eGDR | | | | | | |
| Q1 | Ref |  | Ref |  | Ref |  |
| Q2 | 0.61 (0.46-0.80) | <0.001 | 0.63 (0.48-0.83) | <0.001 | 0.74 (0.55-1.01) | 0.057 |
| Q3 | 0.41 (0.30-0.55) | <0.001 | 0.45 (0.33-0.60) | <0.001 | 0.55 (0.39-0.78) | <0.001 |
| Q4 | 0.32 (0.23-0.44) | <0.001 | 0.35 (0.25-0.48) | <0.001 | 0.45 (0.31-0.64) | <0.001 |
| p for trend |  | <0.001 |  | <0.001 |  | <0.001 |
| Per SD | 0.65 (0.58-0.72) | <0.001 | 0.67 (0.60-0.75) | <0.001 | 0.74 (0.65-0.84) | <0.001 |

Crude model, unadjusted for covariates; Model 1, adjusted for age and gender; Model 2, adjusted for age, gender, hukou status, education status, marital status,smoking status, drinking status, TC, LDL-c, eGFR,diabetes, lipid-lowering therapy, antihypertensive therapy, and diabetes treatment.

eGDR, estimated glucose disposal rate; CVD, cardiovascular diseases; Q1, Quartile 1; Q2, Quartile 2; Q3, Quartile 3; Q4, Quartile 4; OR, odds ratio; CI, confidence interval; SD, standard deviation.
