# Supplementary material for: Changes in the Estimated Glucose Disposal Rate and Incident Cardiovascular Disease in Patients with Cardiovascular–Kidney–Metabolic Syndrome Stages 0–3: A Prospective Cohort Study in China
Source: Research Square preprint supplement (doi:10.21203/rs.3.rs-7331938/v1), 2025-09-11
Supplement: Supplementary file 2 [file 7e735c05eecd65c495759931.docx]

**Table S3. Baseline characteristics stratified by cumulative eGDR quartiles in CKM syndrome stage 0–3**

| **Characteristic** | **Overall (N=2862)** | **Q1 (N=716)** | **Q2 (N=715)** | **Q3 (N=715)** | **Q4 (N=716)** | **P value** |
| --- | --- | --- | --- | --- | --- | --- |
| Age,years | 57.00 [51.00, 63.00] | 59.00 [53.00, 65.00] | 58.00 [52.00, 65.00] | 56.00 [49.00, 61.00] | 55.00 [49.00, 61.00] | <0.001 |
| Gender,% |  |  |  |  |  | 0.015 |
| Female | 1299 (45.4) | 297 (41.5) | 356 (49.8) | 317 (44.3) | 329 ( 45.9) |  |
| Male | 1563 (54.6) | 419 (58.5) | 359 (50.2) | 398 (55.7) | 387 ( 54.1) |  |
| Marital status,% |  |  |  |  |  | 0.13 |
| Married | 2509 (87.7) | 636 (88.8) | 609 (85.2) | 630 (88.1) | 634 ( 88.5) |  |
| Others | 353 (12.3) | 80 (11.2) | 106 (14.8) | 85 (11.9) | 82 ( 11.5) |  |
| Education,% |  |  |  |  |  | 0.012 |
| College or above | 73 ( 2.6) | 22 ( 3.1) | 19 ( 2.7) | 17 ( 2.4) | 15 ( 2.1) |  |
| Elementary school or below | 1922 (67.2) | 507 (70.8) | 493 (69.0) | 447 (62.5) | 475 ( 66.3) |  |
| Middle school | 867 (30.3) | 187 (26.1) | 203 (28.4) | 251 (35.1) | 226 ( 31.6) |  |
| Hukou status,% |  |  |  |  |  | 0.018 |
| Agriculture | 2462 (86.0) | 599 (83.7) | 606 (84.8) | 619 (86.6) | 638 ( 89.1) |  |
| Others | 400 (14.0) | 117 (16.3) | 109 (15.2) | 96 (13.4) | 78 ( 10.9) |  |
| Smoking status |  |  |  |  |  | <0.001 |
| Current Smoker | 872 (30.5) | 175 (24.4) | 248 (34.7) | 211 (29.5) | 238 ( 33.2) |  |
| Former Smoker | 204 ( 7.1) | 66 ( 9.2) | 55 ( 7.7) | 49 ( 6.9) | 34 ( 4.7) |  |
| Never Smoked | 1786 (62.4) | 475 (66.3) | 412 (57.6) | 455 (63.6) | 444 ( 62.0) |  |
| Drinking status |  |  |  |  |  | <0.001 |
| Current Drinker | 895 (31.3) | 203 (28.4) | 249 (34.8) | 224 (31.3) | 219 ( 30.6) |  |
| Former Drinker | 190 ( 6.6) | 75 (10.5) | 40 ( 5.6) | 37 ( 5.2) | 38 ( 5.3) |  |
| Never Drinker | 1777 (62.1) | 438 (61.2) | 426 (59.6) | 454 (63.5) | 459 ( 64.1) |  |
| CKM syndrome stages, % |  |  |  |  |  | <0.001 |
| 0 | 114 ( 4.0) | 0 ( 0.0) | 2 ( 0.3) | 11 ( 1.5) | 101 ( 14.1) |  |
| 1 | 356 (12.4) | 0 ( 0.0) | 46 ( 6.4) | 163 (22.8) | 147 ( 20.5) |  |
| 2 | 833 (29.1) | 245 (34.2) | 241 (33.7) | 205 (28.7) | 142 ( 19.8) |  |
| 3 | 1559 (54.5) | 471 (65.8) | 426 (59.6) | 336 (47.0) | 326 ( 45.5) |  |
| BMI,kg/m2 | 23.28 [21.09, 25.80] | 26.01 [23.93, 28.12] | 23.12 [21.29, 25.81] | 23.64 [21.97, 25.42] | 20.71 [19.38, 22.20] | <0.001 |
| SBP,mmHg | 125.33 [114.00, 140.33] | 145.00 [132.67, 156.67] | 133.00 [121.50, 144.67] | 118.67 [110.33, 127.33] | 114.00 [107.00, 122.33] | <0.001 |
| DBP,mmHg | 74.33 [67.33, 82.33] | 83.00 [75.25, 90.67] | 77.33 [70.33, 84.67] | 71.00 [65.33, 76.67] | 68.33 [62.33, 74.00] | <0.001 |
| Diabetes,% |  |  |  |  |  | <0.001 |
| No | 2702 (94.4) | 624 (87.2) | 673 (94.1) | 698 (97.6) | 707 ( 98.7) |  |
| Yes | 160 ( 5.6) | 92 (12.8) | 42 ( 5.9) | 17 ( 2.4) | 9 ( 1.3) |  |
| Hypertension,% |  |  |  |  |  | <0.001 |
| No | 1810 (63.2) | 31 ( 4.3) | 385 (53.8) | 681 (95.2) | 713 ( 99.6) |  |
| Yes | 1052 (36.8) | 685 (95.7) | 330 (46.2) | 34 ( 4.8) | 3 ( 0.4) |  |
| Dyslipidemia,% |  |  |  |  |  | <0.001 |
| No | 2627 (91.8) | 591 (82.5) | 670 (93.7) | 672 (94.0) | 694 ( 96.9) |  |
| Yes | 235 ( 8.2) | 125 (17.5) | 45 ( 6.3) | 43 ( 6.0) | 22 ( 3.1) |  |
| Kidney disease,% |  |  |  |  |  | 0.054 |
| No | 2770 (96.8) | 699 (97.6) | 699 (97.8) | 686 (95.9) | 686 ( 95.8) |  |
| Yes | 92 ( 3.2) | 17 ( 2.4) | 16 ( 2.2) | 29 ( 4.1) | 30 ( 4.2) |  |
| Liver disease,% |  |  |  |  |  | 0.445 |
| No | 2787 (97.4) | 699 (97.6) | 692 (96.8) | 701 (98.0) | 695 ( 97.1) |  |
| Yes | 75 ( 2.6) | 17 ( 2.4) | 23 ( 3.2) | 14 ( 2.0) | 21 ( 2.9) |  |
| Lipid-lowering treatment,% |  |  |  |  |  | <0.001 |
| No | 2747 (96.0) | 648 (90.5) | 694 (97.1) | 698 (97.6) | 707 ( 98.7) |  |
| Yes | 115 ( 4.0) | 68 ( 9.5) | 21 ( 2.9) | 17 ( 2.4) | 9 ( 1.3) |  |
| Antihypertensive treatment,% |  |  |  |  |  | <0.001 |
| No | 2431 (84.9) | 375 (52.4) | 629 (88.0) | 711 (99.4) | 716 (100.0) |  |
| Yes | 431 (15.1) | 341 (47.6) | 86 (12.0) | 4 ( 0.6) | 0 ( 0.0) |  |
| Hypoglycemic treatment,% |  |  |  |  |  | <0.001 |
| No | 2760 (96.4) | 653 (91.2) | 692 (96.8) | 704 (98.5) | 711 ( 99.3) |  |
| Yes | 102 ( 3.6) | 63 ( 8.8) | 23 ( 3.2) | 11 ( 1.5) | 5 ( 0.7) |  |
| HbA1c, % | 5.10 [4.90, 5.40] | 5.30 [5.00, 5.70] | 5.20 [4.90, 5.40] | 5.10 [4.90, 5.40] | 5.00 [4.80, 5.20] | <0.001 |
| FBG, mg/dL | 102.60 [95.22, 112.32] | 105.66 [98.41, 120.96] | 103.86 [96.48, 114.12] | 101.34 [94.86, 109.62] | 99.18 [91.98, 106.92] | <0.001 |
| TG, mg/dL | 105.32 [74.34, 155.76] | 134.52 [93.59, 194.92] | 101.78 [74.34, 155.76] | 102.66 [72.57, 143.81] | 87.61 [63.72, 126.56] | <0.001 |
| TC, mg/dL | 191.37 [168.17, 216.11] | 200.07 [175.13, 225.77] | 192.14 [170.88, 218.43] | 187.89 [166.62, 211.28] | 183.63 [161.12, 207.31] | <0.001 |
| HDL-c, mg/dL | 49.10 [40.59, 59.92] | 45.23 [37.50, 52.96] | 49.87 [40.21, 60.70] | 49.10 [41.56, 58.76] | 53.74 [43.98, 63.79] | <0.001 |
| LDL-c, mg/dL | 115.21 [94.33, 139.18] | 122.36 [97.33, 145.75] | 116.75 [95.10, 139.76] | 113.27 [93.94, 136.47] | 110.18 [91.62, 132.70] | <0.001 |
| BUN,mg/dL | 14.96 [12.50, 17.93] | 14.85 [12.35, 17.85] | 15.01 [12.45, 18.11] | 14.90 [12.51, 17.95] | 15.21 [12.80, 17.79] | 0.777 |
| Creatinine,mg/dL | 0.73 [0.64, 0.86] | 0.73 [0.64, 0.87] | 0.73 [0.64, 0.87] | 0.75 [0.63, 0.85] | 0.74 [0.64, 0.85] | 0.522 |
| Uric acid，mg/dL | 4.17 [3.46, 5.01] | 4.41 [3.66, 5.38] | 4.25 [3.49, 5.07] | 4.13 [3.49, 4.92] | 3.93 [3.25, 4.64] | <0.001 |
| eGFR，mL/min/1.73m² | 96.51 [86.87, 103.80] | 94.47 [85.02, 101.15] | 95.84 [86.58, 103.85] | 97.88 [87.54, 104.70] | 98.30 [87.78, 104.64] | <0.001 |
| Cumulative eGDR | 28.22 [21.64, 32.26] | 18.82 [16.87, 20.20] | 24.99 [23.17, 26.63] | 30.53 [29.38, 31.36] | 33.87 [32.98, 35.04] | <0.001 |
| CVD |  |  |  |  |  | <0.001 |
| No | 2458 (85.9) | 555 (77.5) | 609 (85.2) | 640 (89.5) | 654 ( 91.3) |  |
| Yes | 404 (14.1) | 161 (22.5) | 106 (14.8) | 75 (10.5) | 62 ( 8.7) |  |
| Heart disease,% |  |  |  |  |  | <0.001 |
| No | 2608 (91.1) | 623 (87.0) | 644 (90.1) | 668 (93.4) | 673 ( 94.0) |  |
| Yes | 254 ( 8.9) | 93 (13.0) | 71 ( 9.9) | 47 ( 6.6) | 43 ( 6.0) |  |
| Stroke,% |  |  |  |  |  | <0.001 |
| No | 2685 (93.8) | 637 (89.0) | 668 (93.4) | 685 (95.8) | 695 ( 97.1) |  |
| Yes | 177 ( 6.2) | 79 (11.0) | 47 ( 6.6) | 30 ( 4.2) | 21 ( 2.9) |  |

BMI, body Mass Index; SBP, systolic blood pressure; DBP, diastolic blood pressure; HbA1c, glycated hemoglobin A1c;FBG, fasting blood glucose; TG, triglycerides; TC, total cholesterol;HDL-c,high-density lipoprotein cholesterol; LDL-c, low-density lipoprotein cholesterol; BUN,blood urea nitrogen; eGFR, estimated glomerular filtration rate; eGDR, estimated glucose disposal rate; CVD, cardiovascular diseases.
