# Supplementary material for: Changes in the Estimated Glucose Disposal Rate and Incident Cardiovascular Disease in Patients with Cardiovascular–Kidney–Metabolic Syndrome Stages 0–3: A Prospective Cohort Study in China
Source: Research Square preprint supplement (doi:10.21203/rs.3.rs-7331938/v1), 2025-09-11
Supplement: Supplementary file 3 [file cd2eaf0d1bac50d11dd1c82c.docx]

**Table S5. Association between different eGDR change and CVD after excluding individuals with cancer**

|  | Crude model |  | Model1 |  | Model2 |  |
| --- | --- | --- | --- | --- | --- | --- |
| eGDR | OR（95%CI） | P value | OR（95%CI） | P value | OR（95%CI） | P value |
| Change in the eGDR | | | | | | |
| 1 | Ref |  | Ref |  | Ref |  |
| 2 | 2.00 (1.49-2.67) | <0.001 | 1.91 (1.42-2.56) | <0.001 | 1.83 (1.36-2.45) | <0.001 |
| 3 | 2.67 (2.09-3.42) | <0.001 | 2.44 (1.90-3.14) | <0.001 | 1.92 (1.42-2.57) | <0.001 |
| Cumulative eGDR | | | | | | |
| Q1 | Ref |  | Ref |  | Ref |  |
| Q2 | 0.60 (0.46-0.79) | <0.001 | 0.62 (0.47-0.82) | <0.001 | 0.75 (0.55-1.01) | 0.062 |
| Q3 | 0.40 (0.29-0.54) | <0.001 | 0.44 (0.32-0.59) | <0.001 | 0.55 (0.39-0.78) | <0.001 |
| Q4 | 0.33 (0.24-0.45) | <0.001 | 0.36 (0.26-0.49) | <0.001 | 0.47 (0.33-0.67) | <0.001 |
| p for trend |  | <0.001 |  | <0.001 |  | <0.001 |
| Per SD | 0.65 (0.58-0.72) | <0.001 | 0.67 (0.60-0.74) | <0.001 | 0.74 (0.65-0.85) | <0.001 |

Crude model, unadjusted for covariates; Model 1, adjusted for age and gender; Model 2, adjusted for age, gender, hukou status, education status, marital status,smoking status, drinking status, TC, LDL-c, eGFR,diabetes, lipid-lowering therapy, antihypertensive therapy, and diabetes treatment.

eGDR, estimated glucose disposal rate; CVD, cardiovascular diseases; Q1, Quartile 1; Q2, Quartile 2; Q3, Quartile 3; Q4, Quartile 4; OR, odds ratio; CI, confidence interval; SD, standard deviation.
