# Supplementary material for: Changes in the Estimated Glucose Disposal Rate and Incident Cardiovascular Disease in Patients with Cardiovascular–Kidney–Metabolic Syndrome Stages 0–3: A Prospective Cohort Study in China
Source: Research Square preprint supplement (doi:10.21203/rs.3.rs-7331938/v1), 2025-09-11
Supplement: Supplementary file 5 [file f17fb240cacbca5bdf4108cf.docx]

**Table S6. Association between different eGDR change and CVD at extended follow-up to 2020**

|  | Crude model |  | Model1 |  | Model2 |  |
| --- | --- | --- | --- | --- | --- | --- |
| eGDR | OR（95%CI） | P value | OR（95%CI） | P value | OR（95%CI） | P value |
| Change in the eGDR | | | | | | |
| 1 | Ref |  | Ref |  | Ref |  |
| 2 | 2.15 (1.64-2.82) | <0.001 | 2.13 (1.62-2.79) | <0.001 | 2.06 (1.56-2.72) | <0.001 |
| 3 | 2.70 (2.14-3.41) | <0.001 | 2.59 (2.04-3.28) | <0.001 | 2.31 (1.75-3.04) | <0.001 |
| Cumulative eGDR | | | | | | |
| Q1 | Ref |  | Ref |  | Ref |  |
| Q2 | 0.61 (0.47-0.79) | <0.001 | 0.62 (0.48-0.81) | <0.001 | 0.68 (0.51-0.91) | 0.009 |
| Q3 | 0.40 (0.30-0.53) | <0.001 | 0.42 (0.31-0.56) | <0.001 | 0.46 (0.33-0.63) | <0.001 |
| Q4 | 0.31 (0.23-0.42) | <0.001 | 0.33 (0.24-0.44) | <0.001 | 0.38 (0.27-0.53) | <0.001 |
| p for trend |  | <0.001 |  | <0.001 |  | <0.001 |
| Per SD | 0.63 (0.57-0.70) | <0.001 | 0.65 (0.58-0.71) | <0.001 | 0.67 (0.59-0.76) | <0.001 |

Crude model, unadjusted for covariates; Model 1, adjusted for age and gender; Model 2, adjusted for age, gender, hukou status, education status, marital status,smoking status, drinking status, TC, LDL-c, eGFR,diabetes, lipid-lowering therapy, antihypertensive therapy, and diabetes treatment.

eGDR, estimated glucose disposal rate; CVD, cardiovascular diseases; Q1, Quartile 1; Q2, Quartile 2; Q3, Quartile 3; Q4, Quartile 4; OR, odds ratio; CI, confidence interval; SD, standard deviation.
