# Supplementary material for: Changes in the Estimated Glucose Disposal Rate and Incident Cardiovascular Disease in Patients with Cardiovascular–Kidney–Metabolic Syndrome Stages 0–3: A Prospective Cohort Study in China
Source: Research Square preprint supplement (doi:10.21203/rs.3.rs-7331938/v1), 2025-09-11
Supplement: Supplementary file 6 [file f87c5cda849b01b6f030eab3.docx]

**Table S2. Collinearity Statistics**

| **Variable** | **GVIF** | **Df** | **GVIF^(1/(2*Df))** |
| --- | --- | --- | --- |
| CumeGDR | 1.52165626538829 | 1 | 1.2335543220257 |
| Gender | 2.42091500477664 | 1 | 1.55592898449018 |
| Age | 1.66965163070001 | 1 | 1.29215000317301 |
| Marital status | 1.06662567107131 | 1 | 1.03277571189068 |
| Education | 1.36756921710844 | 2 | 1.08140240016224 |
| Hukou status | 1.14564661434027 | 1 | 1.07034882834535 |
| Smoking status | 2.05897906562391 | 2 | 1.19787908656135 |
| Drinking status | 1.60686784178026 | 2 | 1.12588760981296 |
| TC | 2.47793063888935 | 1 | 1.57414441487728 |
| LDL-c | 2.43995702338155 | 1 | 1.56203617864041 |
| Diabetes | 2.4390476143279 | 1 | 1.56174505420312 |
| Hypoglycemic treatment | 2.49423002151695 | 1 | 1.57931314865575 |
| eGFR | 1.45560294704283 | 1 | 1.2064837118846 |
| Lipid-lowering treatment | 1.15850253621008 | 1 | 1.07633755681481 |
| Antihypertensive treatment | 1.48169591656883 | 1 | 1.21724932391389 |

CumeGDR, Cumulative estimated glucose disposal rate; TC, total cholesterol; LDL-c, low-density lipoprotein cholesterol; eGFR, estimated glomerular filtration rate.
